# Supplementary material for: Synergistic effect of bimetallic NiCo-MOF on foamed nickel for application in high-performance supercapacitors
Source: Royal Society of Chemistry journal article supplement (doi:10.1039/d3ce01053h), 2024-01-01
Supplement: d3ce01053h1.pdf [file d3ce01053h1.pdf]

## **Synergistic effect of bimetal NiCo-MOF on foamed nickel for application in high performance supercapacitors**

Fuhuai Cao, Xinlong Zhang, Qingyang Yin, Chao Yang\*, Jing Liu, Na Liu, Rongmei Liu\*

*Anhui Province Key Laboratory of Functional Coordinated Complexes for Materials Chemistry and Application,  
School of Chemical and Environmental Engineering, Anhui Polytechnic University, Wuhu Anhui 241000, P. R.  
China*

*Fax: +86 553 2871 004; Tel: +86 553 2871 004*

*E-mail: [liurongmei@ahpu.edu.cn](mailto:liurongmei@ahpu.edu.cn), [yangchao@ahpu.edu.cn](mailto:yangchao@ahpu.edu.cn)*

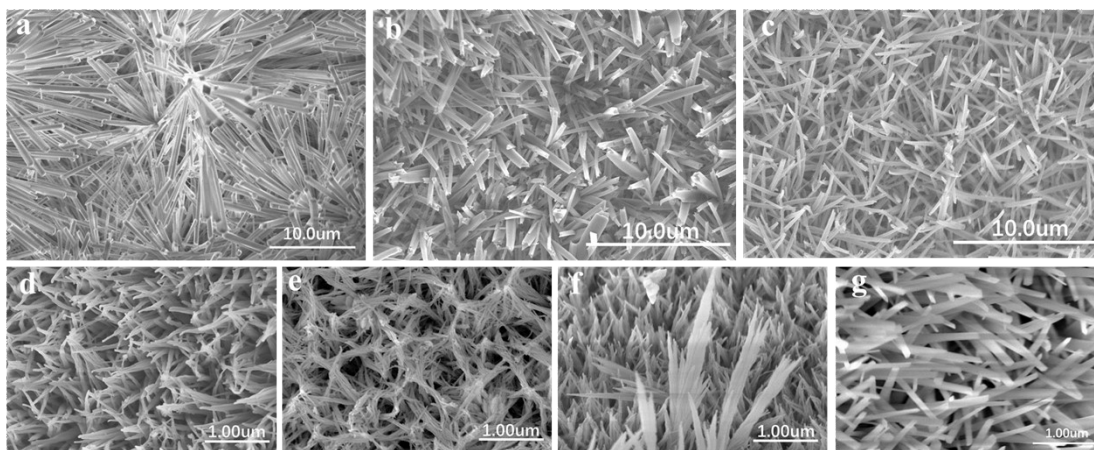

**Fig. S1.** SEM images of (a) Co-MOF, (b) NiCo-MOF-1, (c) NiCo-MOF-2, (d) NiCo-MOF-3, (e) NiCo-MOF-4, (f) NiCo-MOF-5, (g) Ni-MOF.

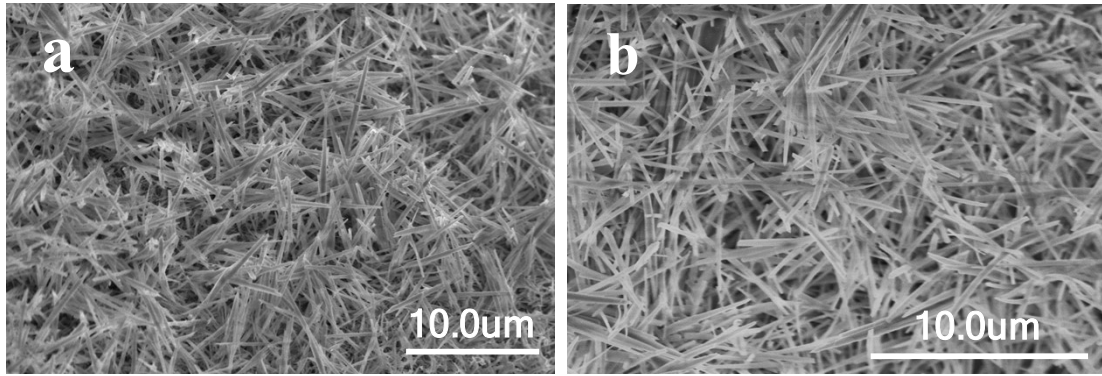

**Fig. S2.** SEM images of Nickel-cobalt ratio (a) 1:3 and (b) 1:5.

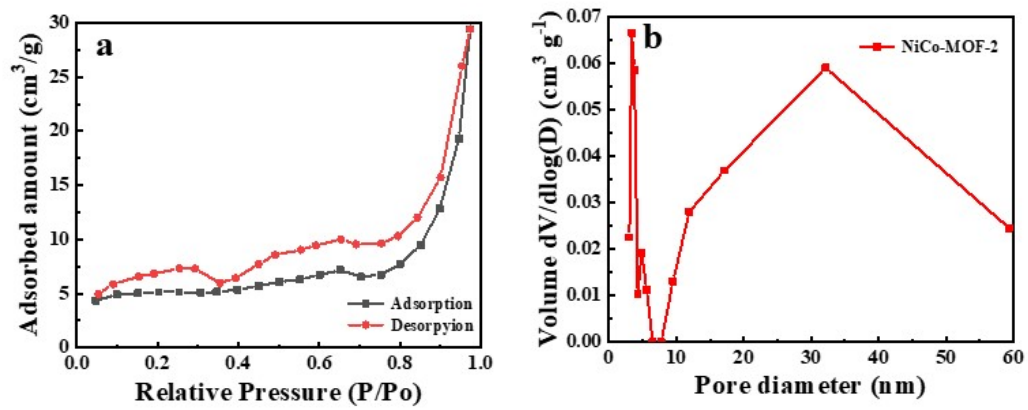

Fig. S3. (a)  $N_2$  adsorption/desorption isotherms, (b) pore size distribution profiles of NiCo-MOF-2.

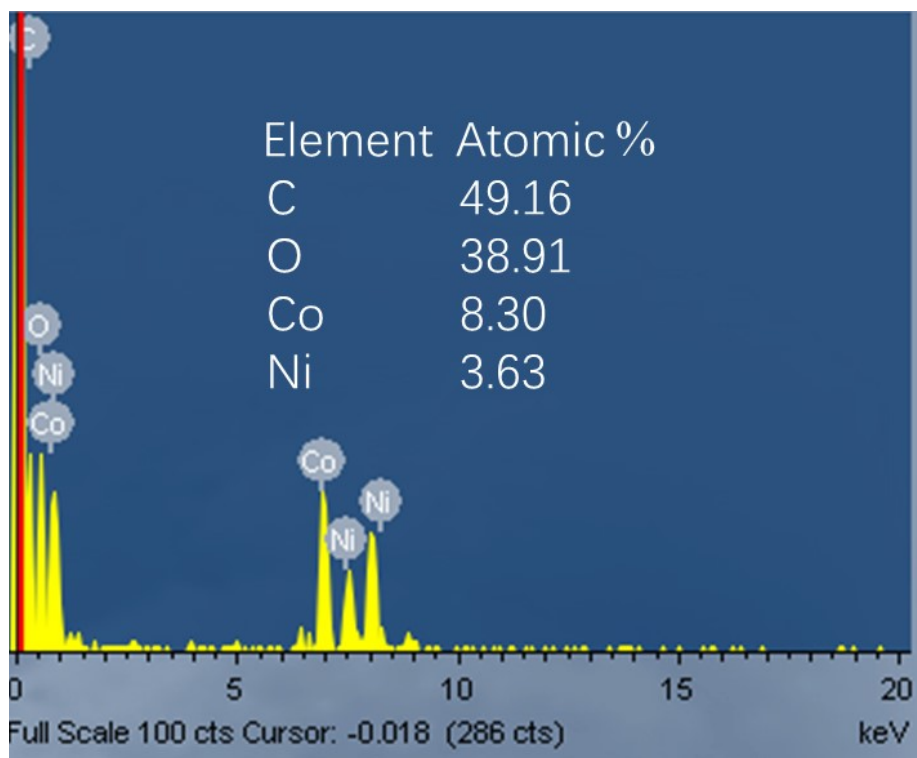

**Fig. S4.** EDAX spectra and EDS data of NiCo-MOF-2 electrode.

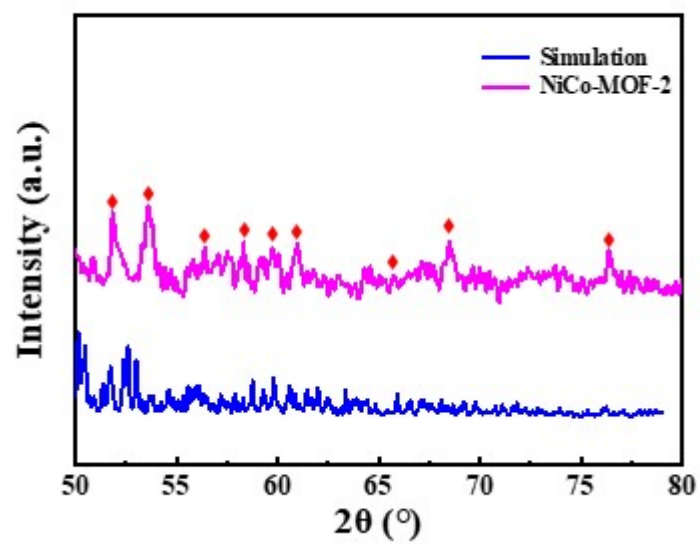

Fig. S5. Enlarged XRD patterns of NiCo-MOF-2 sample.

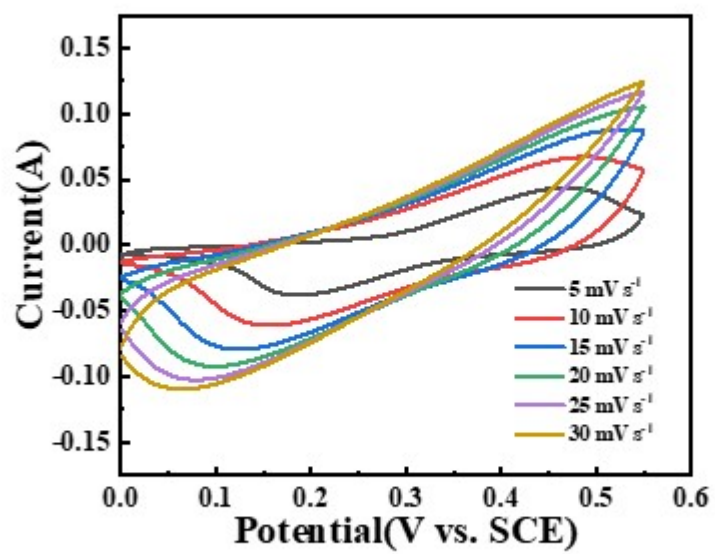

**Fig. S6.** CV curves of NiCo-MOF-2 at the scan rates of 5, 10, 15, 20, 25, and 30 mV s<sup>-1</sup>.

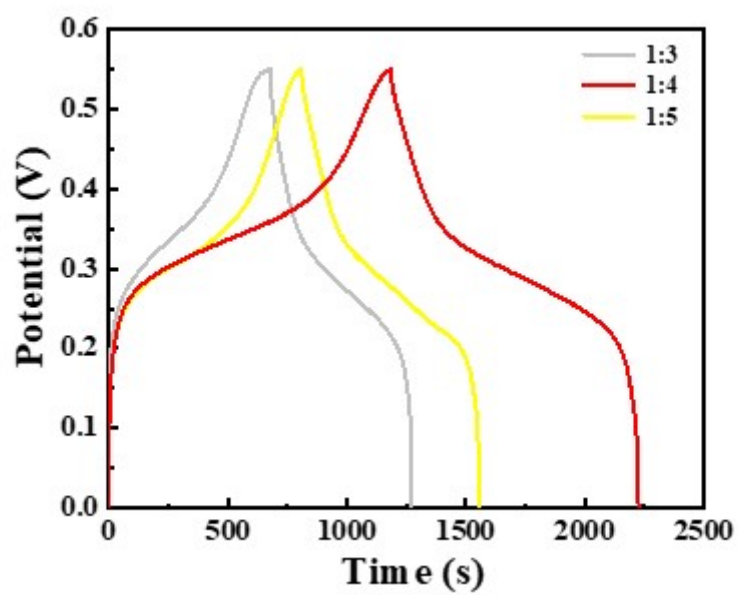

Fig. S7. Charge-discharge comparison diagram of different Nickel-cobalt ratio.



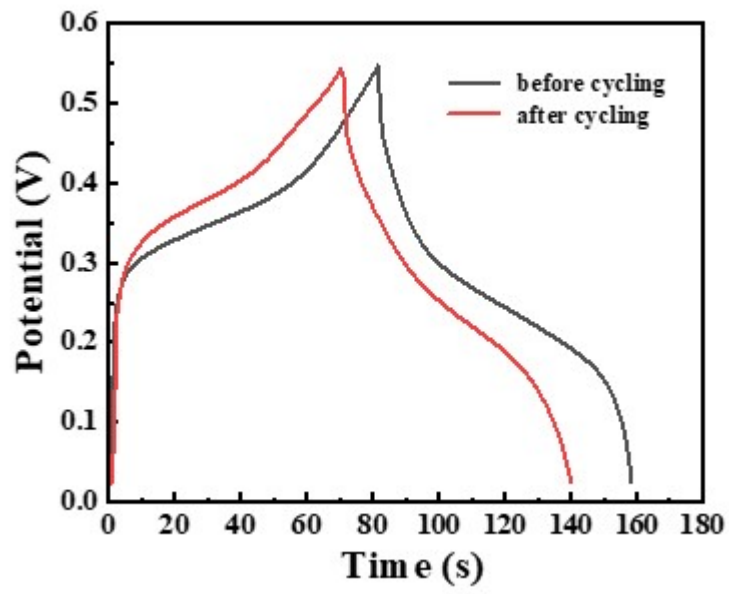

Fig. S8. GCD images of NiCo-MOF-2 before and after cycling.

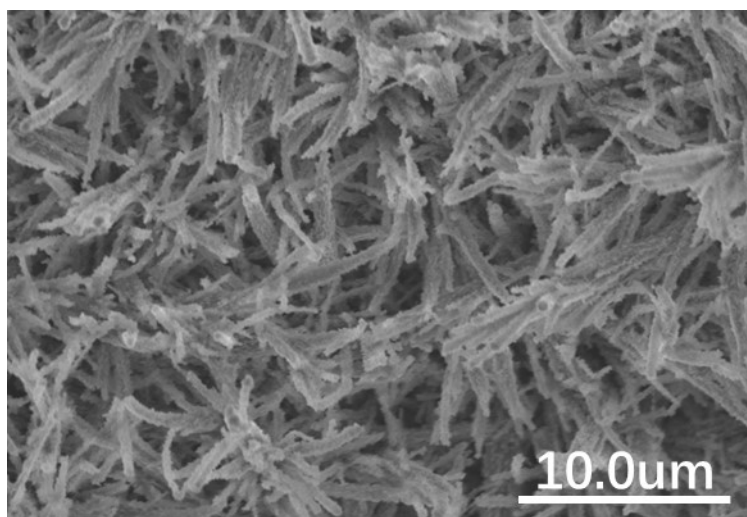

**Fig. S9.** SEM images of NiCo-MOF-2 after cycling.

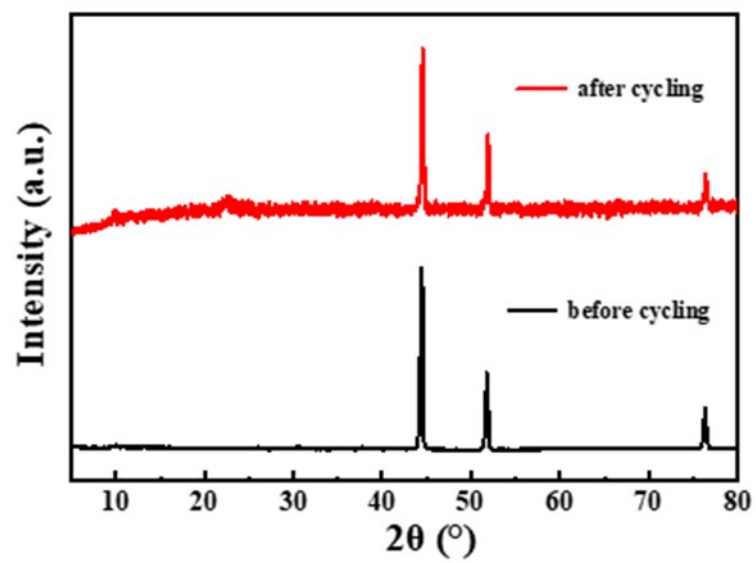

Fig. S10. XRD patterns of NiCo-MOF-2 before and after cycling.

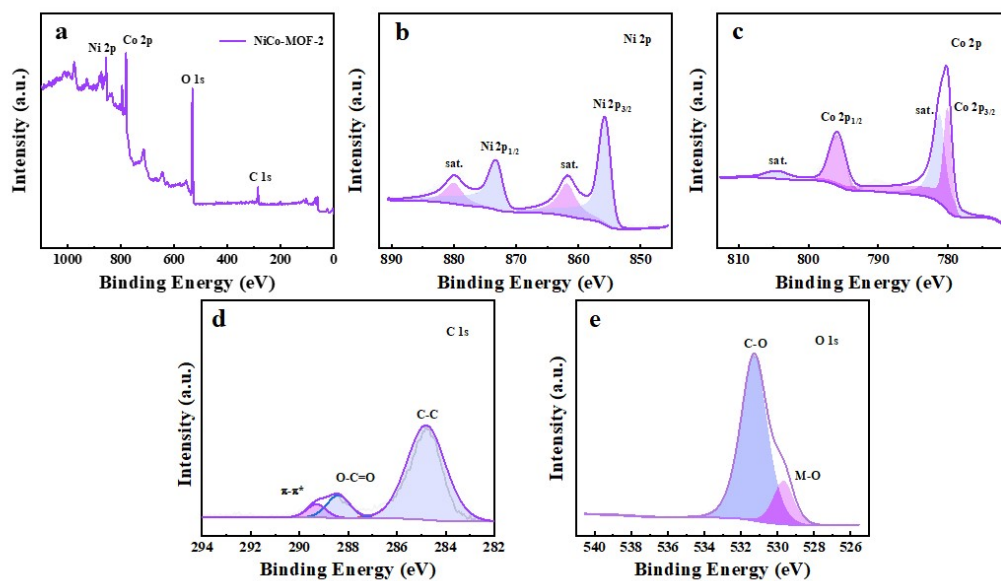

**Fig. S11.** (a) XPS spectra and high-resolution XPS spectra (b) Ni 2p (c) Co 2p (d) C 1s (e) O 1s of NiCo-MOF-2 after cycling.

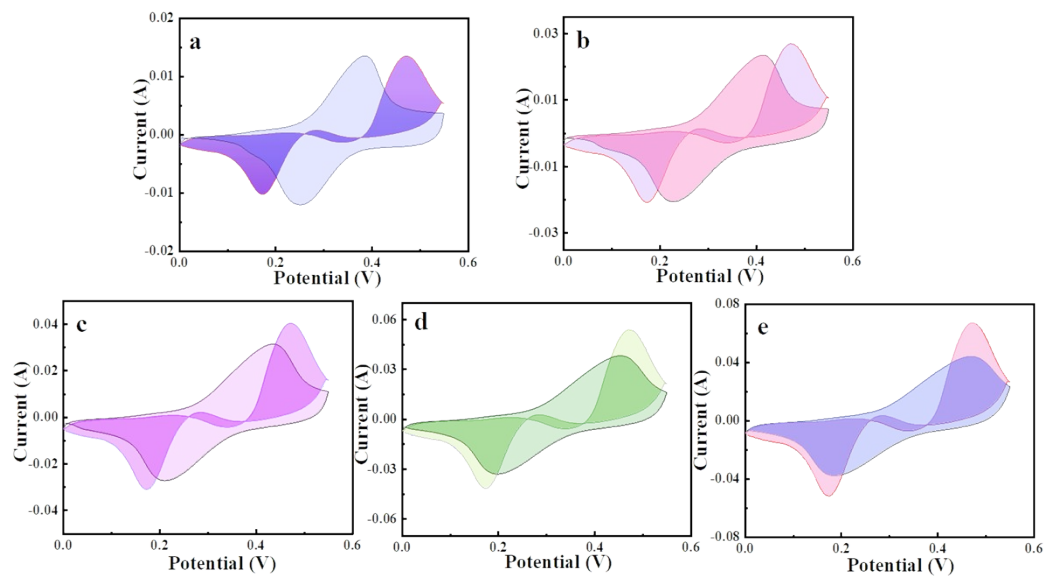

**Fig. S12.** (a-e) Function of log (peak current) vs. log (scan rate).

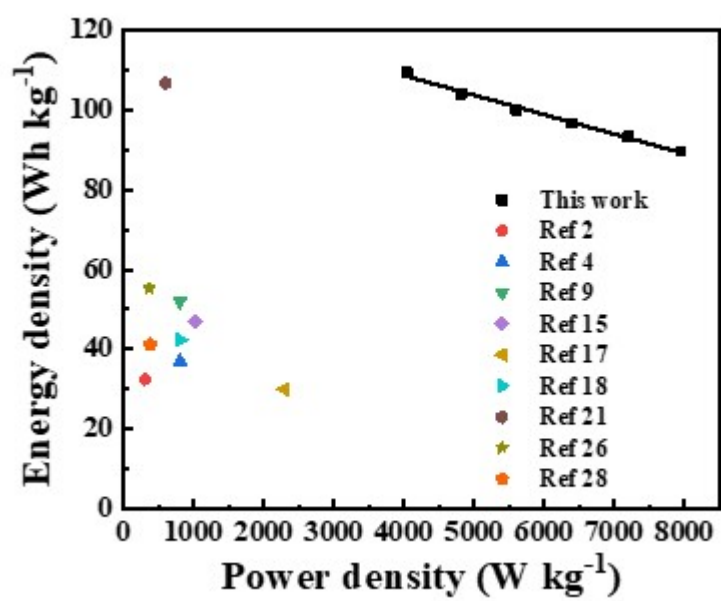

Fig. S13. Comparison of the NiCo-MOF-2 device Ragone graph with previous reports.

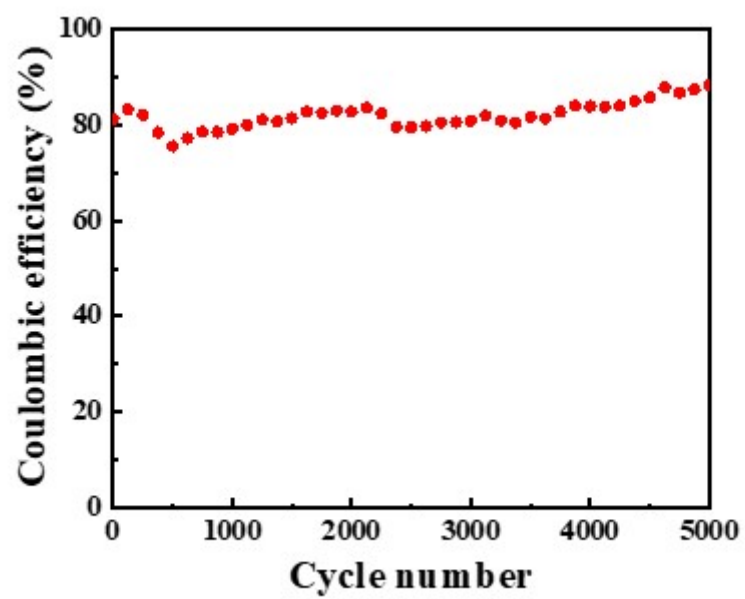

Fig. S14. Coulomb efficiency diagram.

**Tab. S1.** Correlation properties of samples with different Nickel-cobalt ratios.

| <b>Nickel-cobalt ratio</b> | <b>specific capacitance (1 A g<sup>-1</sup> )</b> | <b>cycling stability</b> |
|----------------------------|---------------------------------------------------|--------------------------|
| 0: 1                       | 808.8 F g <sup>-1</sup>                           | 90.8%                    |
| 1: 7                       | 1270.5 F g <sup>-1</sup>                          | 87.0%                    |
| 1: 5                       | 1363.0 F g <sup>-1</sup>                          | 81.3%                    |
| 1: 4                       | 1894.3 F g <sup>-1</sup>                          | 80.2%                    |
| 1: 3                       | 1097.9 F g <sup>-1</sup>                          | 78.8%                    |
| 1: 1                       | 528.3 F g <sup>-1</sup>                           | 82.7%                    |
| 4: 1                       | 912.8 F g <sup>-1</sup>                           | 72.1%                    |
| 7: 1                       | 828.5 F g <sup>-1</sup>                           | 60.3%                    |
| 1: 0                       | 289.0 F g <sup>-1</sup>                           | 91.4%                    |
